# Supplementary material
Source: MDPI journal article supplement (https://www.mdpi.com/2504-477X/3/4/108)
Supplement: s1 [file s1]

# Designed Conducting Polymer Composites that Facilitate Long-Lived, Light-Driven Oxygen and Hydrogen Evolution from Water in a Photoelectrochemical Concentration Cell (PECC)

Mohammed Alsultan, Khalid Zainulabdeen, Pawel Wagner and Gerhard F. Swiegers and Holly Warren

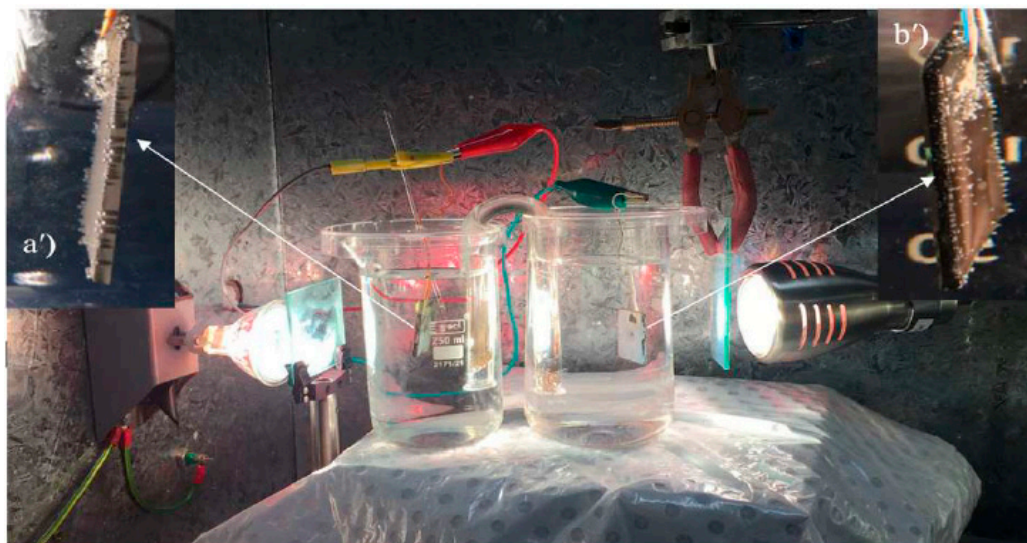

**Figure S1.** Photograph of the experimental setup depicted in Figure 1. The inset photographs (a') and (b') depicts close-ups of the respective electrode surfaces, showing the bubbles of gas formed.

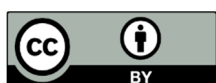

© 2019 by the authors. Licensee MDPI, Basel, Switzerland. This article is an open access article distributed under the terms and conditions of the Creative Commons Attribution (CC BY) license (<http://creativecommons.org/licenses/by/4.0/>).
